# Supplementary material
Source: publisher figshare collection journal article supplement (https://acs.figshare.com/ndownloader/files/4005847)
Supplement: Supplementary file 1 [file 4005847]

# Elucidating features that drive the design of selective antifolates using crystal structures of human dihydrofolate reductase

Kristen M. Lamb, Narendran G-Dayananadan, Dennis L. Wright and Amy C. Anderson\*

Department of Pharmaceutical Sciences, University of Connecticut, 69 N. Eagleville Rd., Storrs,  
CT 06269

Contents:

**Figure S1.** Electron density for ligands bound to human DHFR

**Figure S2.** Ligand conformations as bound to human DHFR.

**Figure S3.** Structural alignment for human, *S. aureus* and *C. glabrata* DHFR

**Figure S4.** Superpositions of loop region in a survey of crystal structures of human DHFR bound to a variety of ligands.

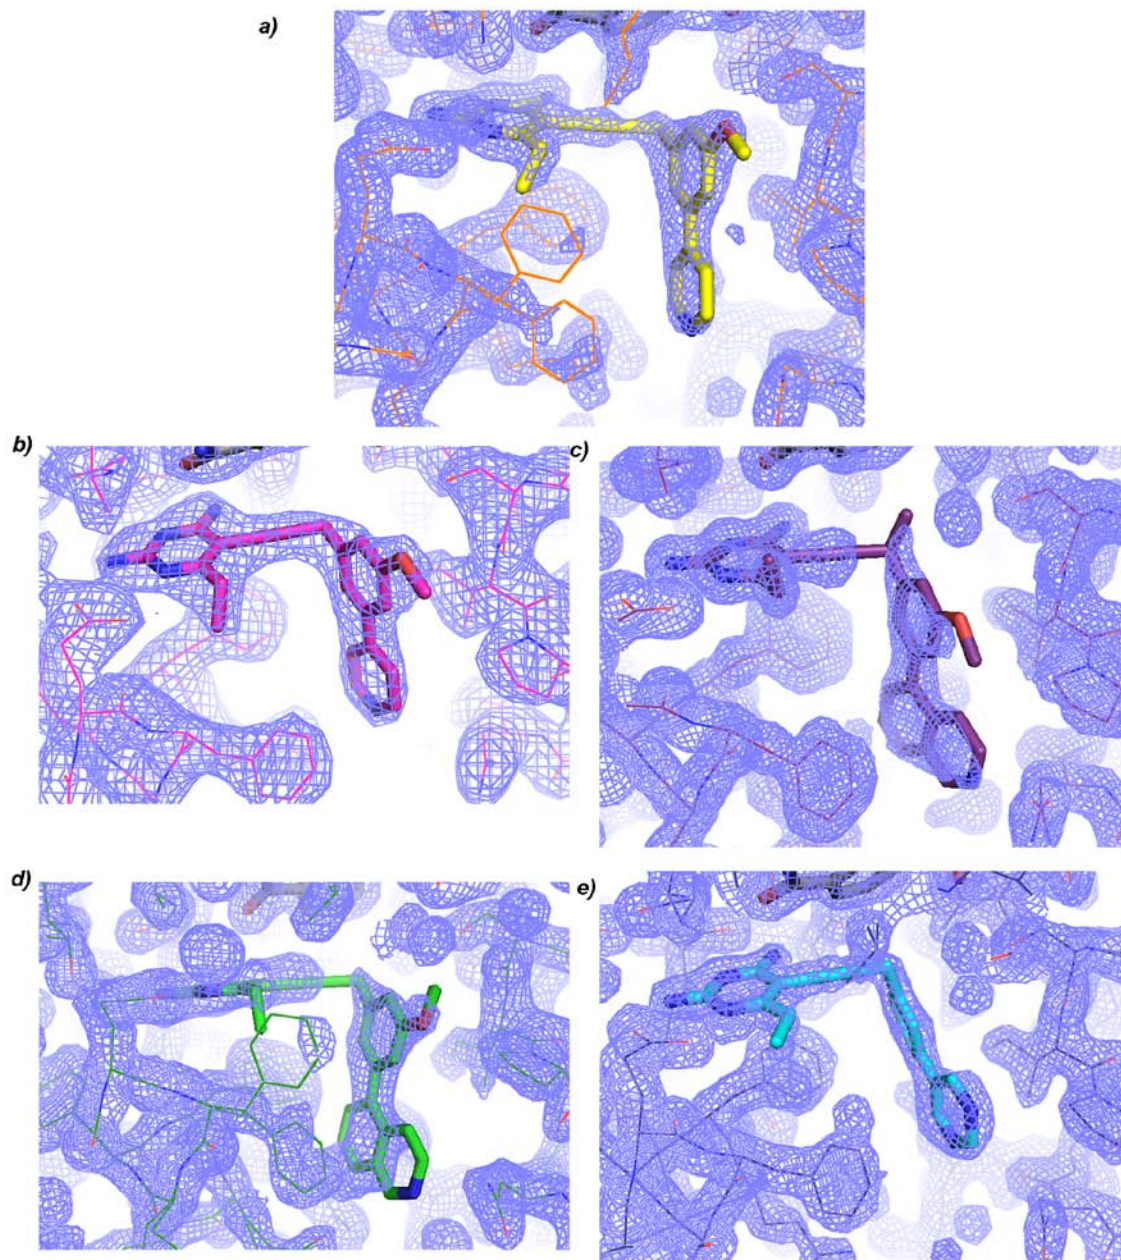

**Figure S1.** Electron density (2Fo-Fc) for ligands in the active site of human DHFR. a) UCP1006, b) UCP1015, c) UCP1019, d) UCP1017, e) UCP1025. Density is contoured at 1.5  $\sigma$  for UCP1006, UCP1015 and UCP1025; density is contoured at 1.0  $\sigma$  for UCP1017 and UCP1019.

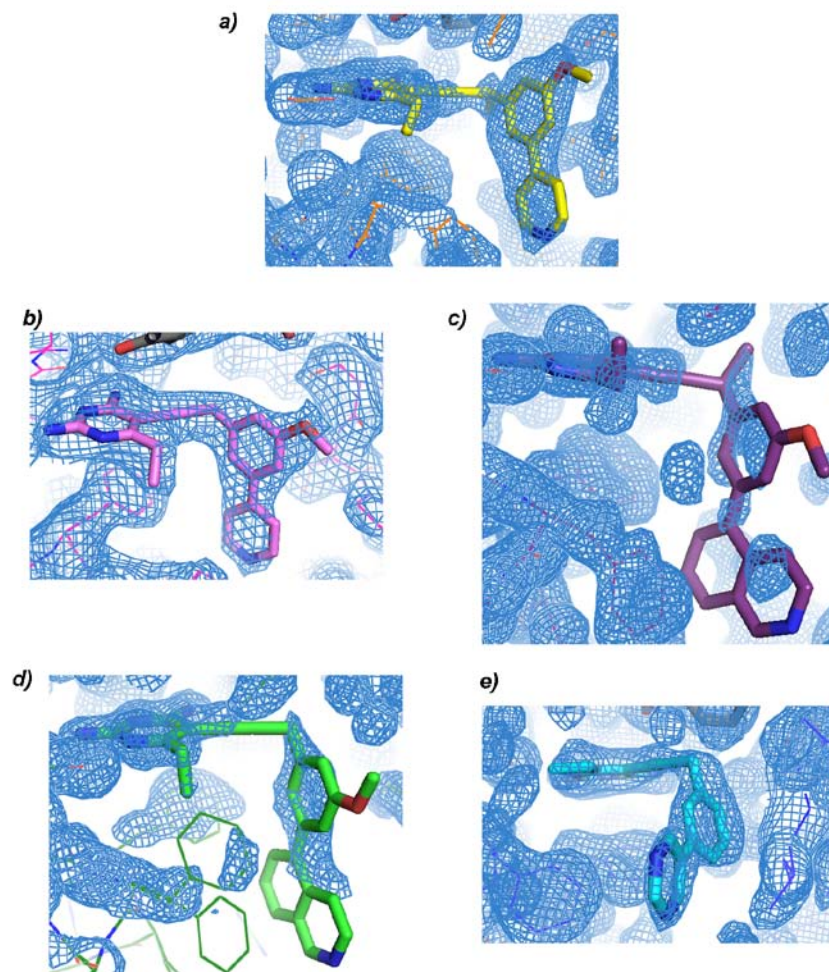

**Figure S1, cont.** Electron density visualized using simulated annealing omit maps for ligands in the active site of human DHFR. a) UCP1006, b) UCP1015, c) UCP1019, d) UCP1017, e) UCP1025.

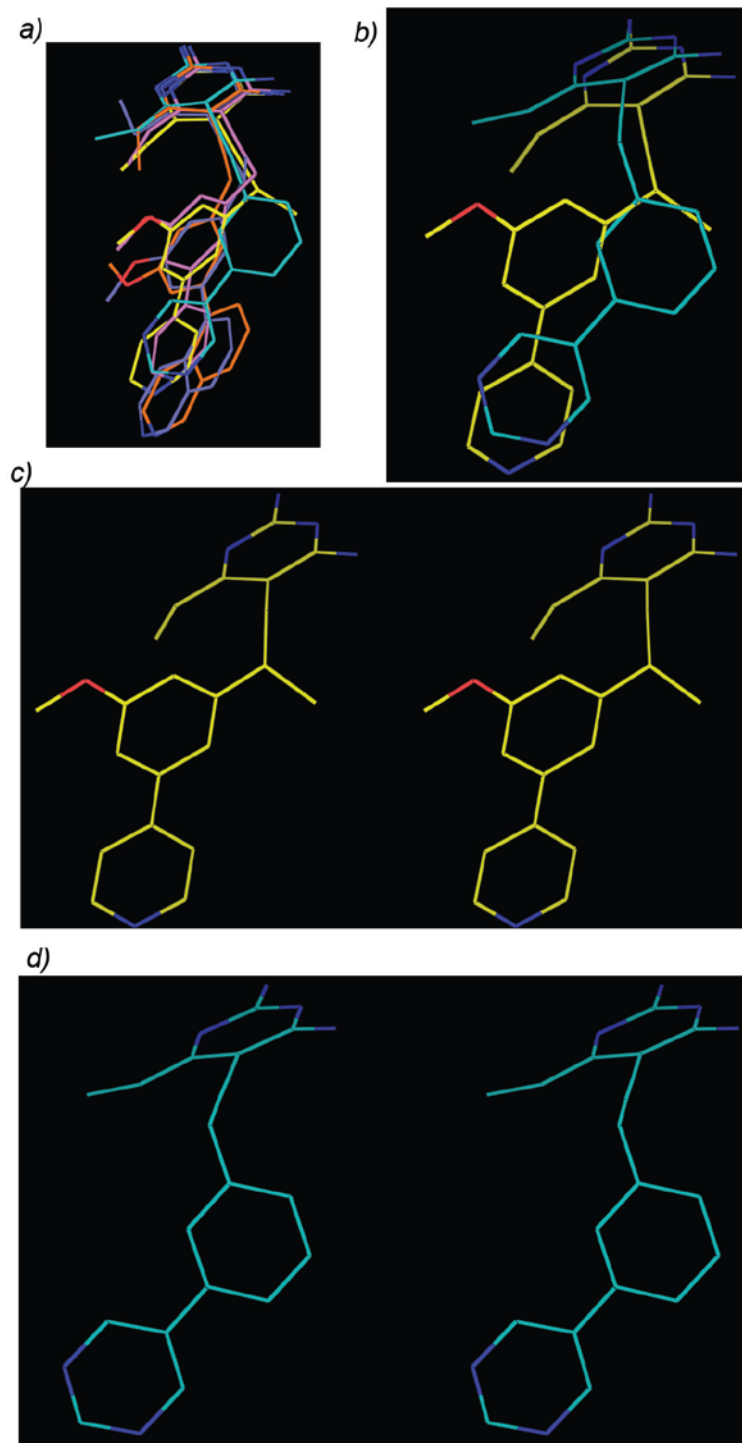

**Figure S2.** Ligand conformations as bound to human DHFR. All of the inhibitors with the exception of UCP1025 adopt approximately the same dihedral angle around the propargylic carbon. UCP1025 adopts a different angle, forcing the biaryl system “backward” in this orientation. a) all inhibitors superposed (yellow: UCP1006, blue: UCP1025, orange: UCP1017, purple: UCP1019, pink: UCP1015) b) UCP1006 superimposed with only UCP1025 for clarity c) stereoview of UCP1006, d) stereoview of UCP1025

```

h  1  MVGSLNCIVAVSQ-NMGIGKNGDLPWPPLRNEFRYFQRM TTTSSVEGKQNL
Sa 0   MTL SILVAHDL-QRVIGFENQLPWH-LPNDLKHVKKLSTG-----HT
Cg 1  MSKPVVGIVAALLPPEMGIGFQGNLPW-RLAKEMKYFREVTTLTNDNSKQNV

h  51  VIMGKKTWFSIPEKNRPLKGRINLVLSRELKEPP---QGAHFLSRSLDDALK
Sa 40  LVMGRKTFESIG---KPLPNRRNVVLTSDTSFNV---EGVDVIH-SIEDIYQ
Cg 52  VIMGRKTWESIPQKFRPLPKRINVVVSR SFDGELRKVEDGIYHSNSLRNCLT

h  100 LTEQ-PELAN-KVDMVWIVGGSSVYKEAMNHPGHLKLFVTRIMQ-----DF
Sa  86 LPG-----HVFIFGGQTLFEEMIDKVD--DMYITVIEG-----KF
Cg 104 ALQSS-LANENKIERIYIIGGGEIYRQSM DL--ADHWLITKIMPLPETTIP

h  145 ESDTFFPE--IDLEKYKLLP-EYPG-----VLSD
Sa 119 RGD TFFPP--YTFEDWEVAS-SVEG-----KLD-
Cg 152 QMDTFLQKQELEQ-RFYDNSDKLVDFLPSSIQLEGRLTSQEWNGELVKGLP

h  172 VQEEKGIKYKFE BYEKND
Sa 144 --EKNTIPHTFLHLIRKK
Cg 202 -VQEKGYQFYFTLYTKK

```

**Figure S3.** Structural alignment of human, *S. aureus* and *C. glabrata* DHFR

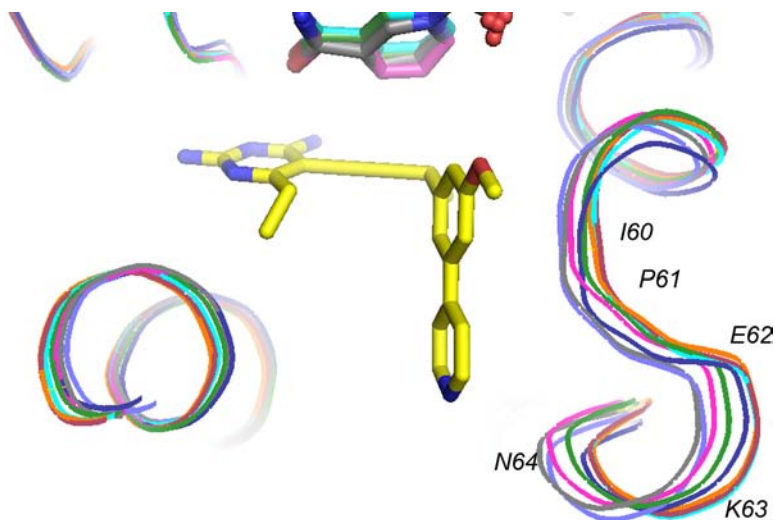

**Figure S4.** Superpositions of loop region in a survey of crystal structures of human DHFR bound to a variety of ligands.

| PDB ID      | Color      | Distance I60 | Distance E62 | Distance K63 | Distance N64 |
|-------------|------------|--------------|--------------|--------------|--------------|
| <b>4KAK</b> | Orange     |              |              |              |              |
| <b>1KMV</b> | Periwinkle | 1.0          | 1.7          | 2.1          | 1.5          |
| <b>1S3W</b> | Green      | 0.5          | 1.1          | 1.5          | 1.2          |
| <b>3NZD</b> | Magenta    | 0.8          | 1.3          | 1.9          | 1.6          |
| <b>2C2S</b> | Light Blue | 0.2          | 0.4          | 0.4          | 0.1          |
| <b>2W3A</b> | Raspberry  | 0.2          | 0.3          | 0.3          | 0.2          |
| <b>1OHJ</b> | Dark Blue  | 0.9          | 0.8          | 0.9          | 0.4          |
| <b>4DDR</b> | Light Gray | 1.0          | 1.8          | 2.6          | 1.8          |
